# Supplementary material
Source: PubMed Central journal article supplement (PMC4000829)
Supplement: 1315325111_pnas.201315325SI.pdf [file 1315325111_pnas.201315325SI.pdf]

# Supporting Information

Edenberg et al. 10.1073/pnas.1315325111

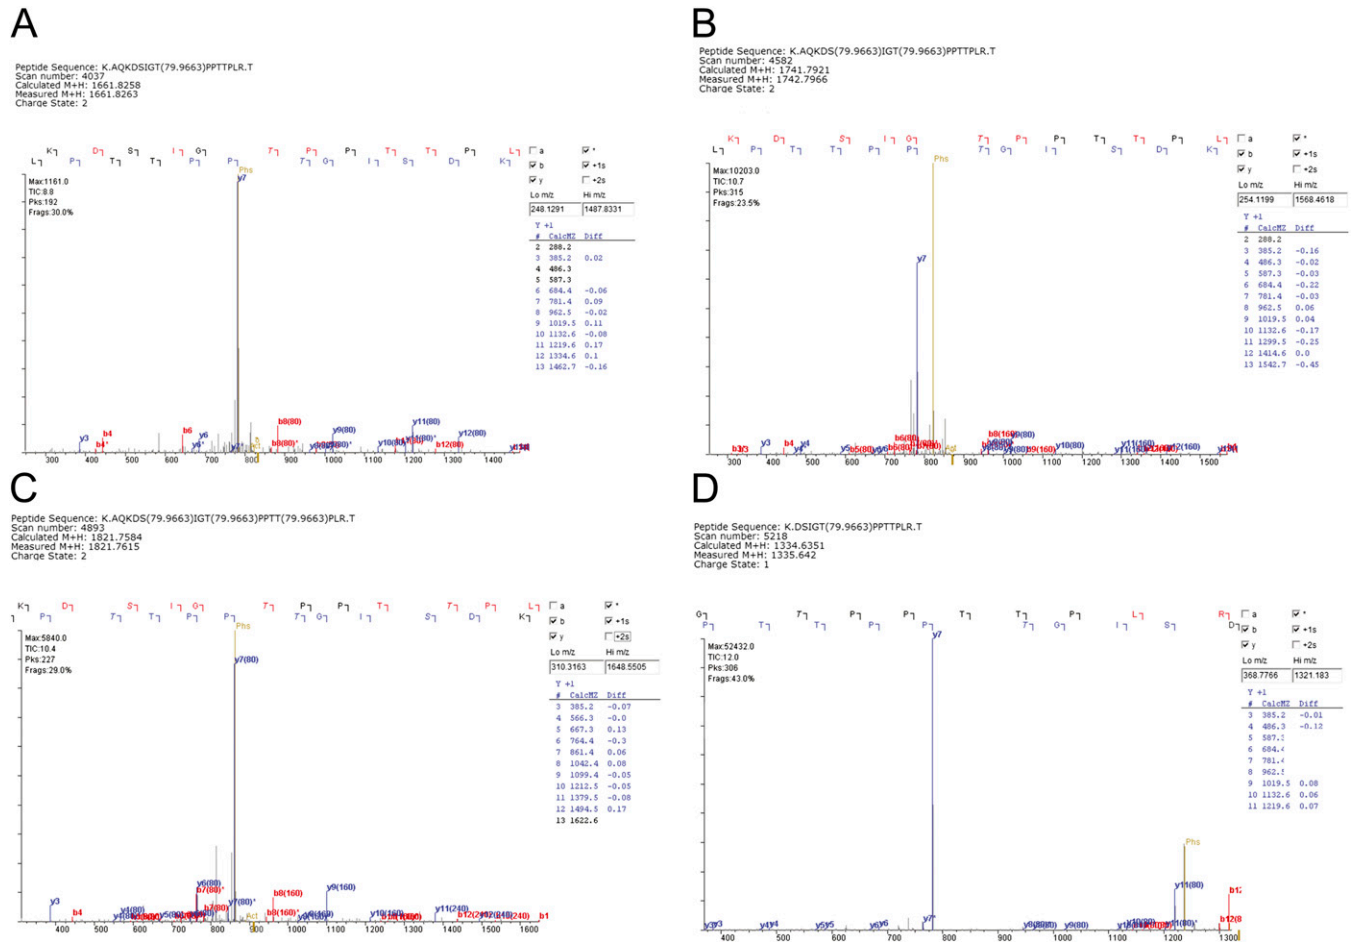

Fig. S1. (Continued)

**E**

Peptide Sequence: K.DSIGT(79.9663)PPTTPLR.T  
 Scan number: 5255  
 Calculated M+H: 1334.6351  
 Measured M+H: 1334.6362  
 Charge State: 2

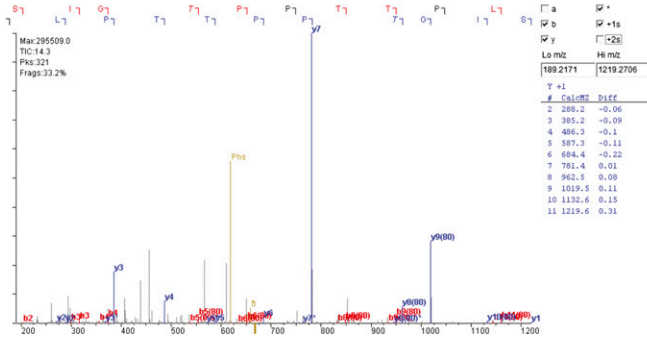**F**

Peptide Sequence: K.DSIGT(79.9663)PPTT(79.9663)PLR.T  
 Scan number: 5549  
 Calculated M+H: 1414.6014  
 Measured M+H: 1414.6018  
 Charge State: 2

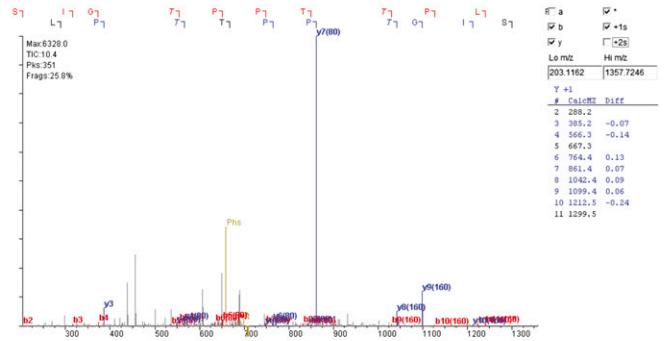**G**

Peptide Sequence: R.KILSPENSS(79.9663)EEDEEENLDR.K  
 Scan number: 4641  
 Calculated M+H: 2414.0242  
 Measured M+H: 2415.0247  
 Charge State: 3

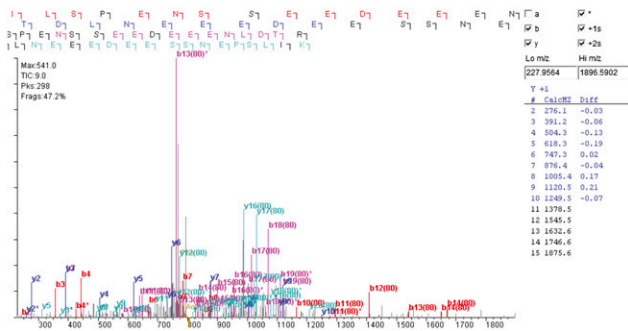**H**

Peptide Sequence: R.KILS(79.9663)PENSS(79.9663)EEDEEENLDR.K  
 Scan number: 5527  
 Calculated M+H: 2493.9905  
 Measured M+H: 2494.9937  
 Charge State: 2

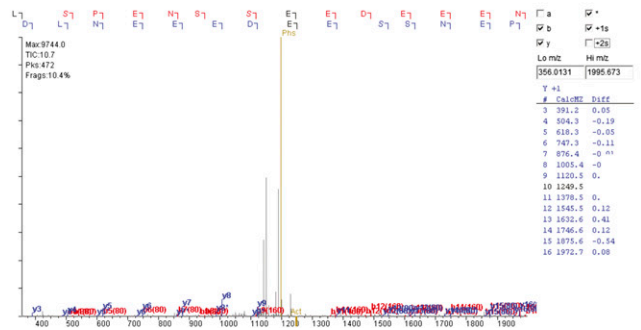

Fig. S1. (Continued)

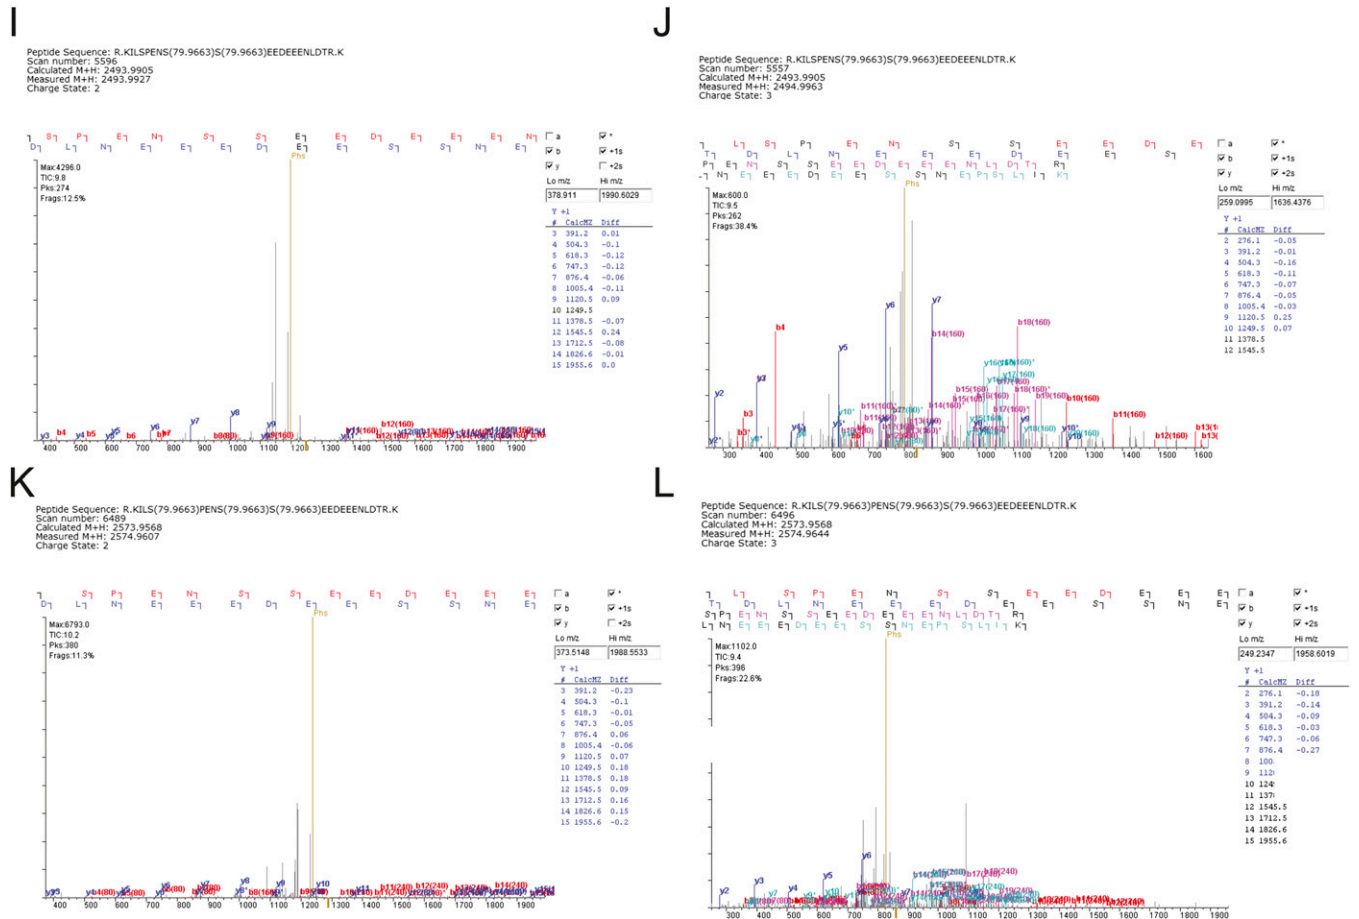

Fig. S1. (Continued)

M

Peptide Sequence: K.ILSPENSS(79.9663)EEDEEENLDTR.K  
 Scan number: 5428  
 Calculated M+H: 2285.9292  
 Measured M+H: 2285.932  
 Charge State: 2

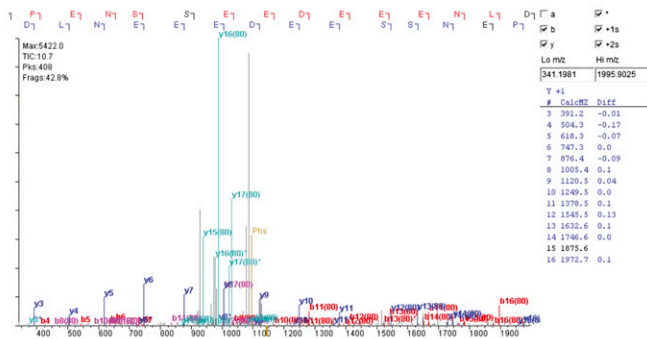

N

Peptide Sequence: K.ILS(79.9663)PENSS(79.9663)EEDEEENLDTR.K  
 Scan number: 6537  
 Calculated M+H: 2365.8955  
 Measured M+H: 2365.8982  
 Charge State: 2

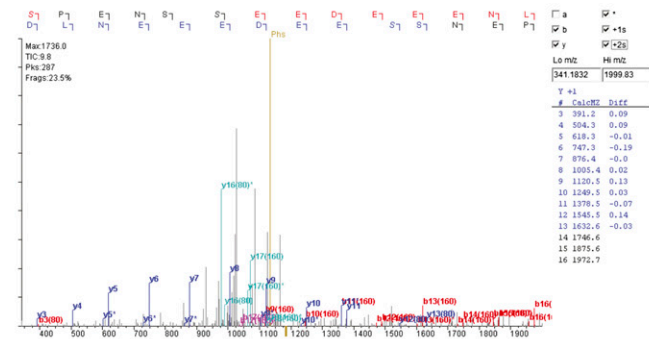

O

Peptide Sequence: K.ILSPENS(79.9663)S(79.9663)EEDEEENLDTR.K  
 Scan number: 6674  
 Calculated M+H: 2365.8955  
 Measured M+H: 2366.9055  
 Charge State: 2

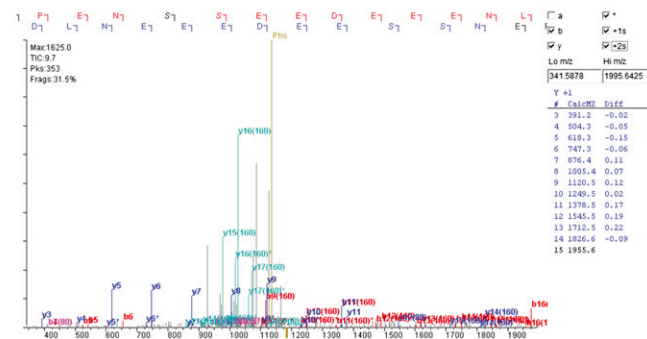

P

Peptide Sequence: K.ILS(79.9663)PENS(79.9663)S(79.9663)EEDEEENLDTR.K  
 Scan number: 15674  
 Calculated M+H: 2445.8618  
 Measured M+H: 2446.8682  
 Charge State: 2

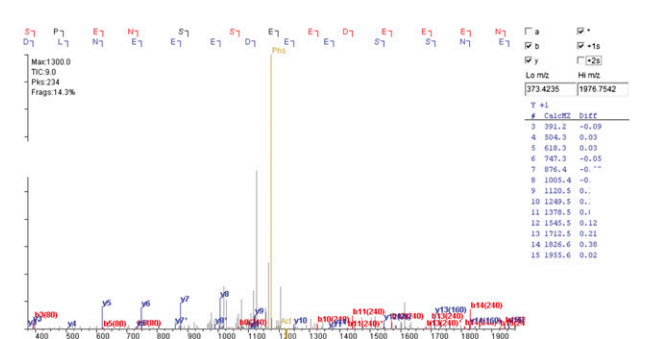

Fig. S1. (Continued)

Q

Peptide Sequence: K.IILSPENS(79.9663)S(79.9663)EEDEEENLDRK.R  
 Scan number: 5339  
 Calculated M+H: 2493.9905  
 Measured M+H: 2494.9949  
 Charge State: 2

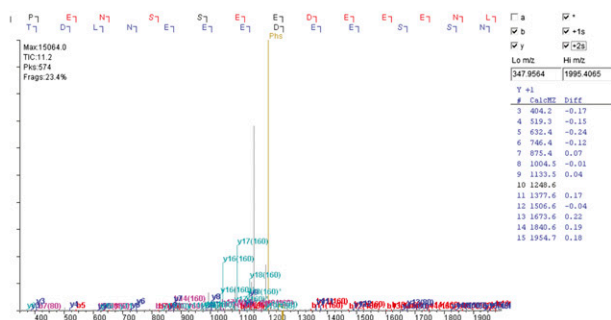

R

Peptide Sequence: K.IILSPENS(79.9663)S(79.9663)EEDEEENLDRK.R  
 Scan number: 5343  
 Calculated M+H: 2493.9905  
 Measured M+H: 2494.997  
 Charge State: 3

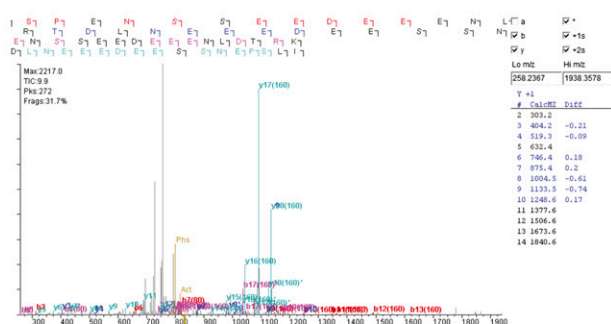

S

Peptide Sequence: K.DSISGT(79.9663)PPTTPLR.T  
 Scan number: 5394  
 Calculated M+H: 1334.6351  
 Measured M+H: 1334.6373  
 Charge State: 2

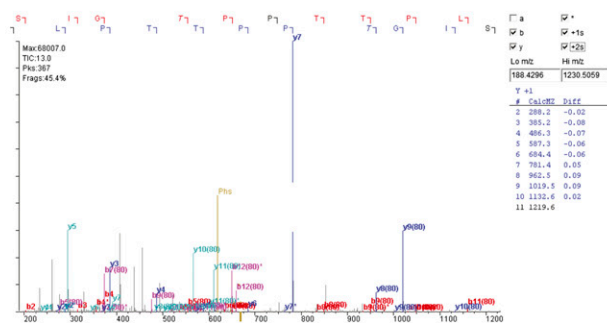

Fig. S1. Spectra from mass spectrometry analysis of phospho-sites identified within degnon 1 (D1) and degnon 2 (D2). (A–R) Spectra from purification in the presence of methyl methane sulfonate (MMS). (S) Spectra from purification from untreated cells. All sites were identified in more than one peptide.



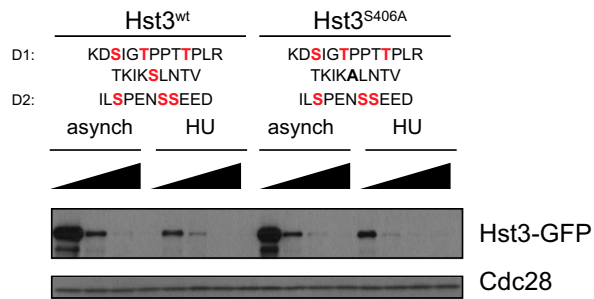

**Fig. S4.** Hst3 turnover is unaffected by mutation of S406. Wild-type phosphorylated residues are in red, and mutations are in black. The experiment was performed as in Fig. 4, with Hst3 expressed under the control of the *GAL1* promoter and tagged with GFP. The black triangle indicates the time after the addition of cycloheximide ( $t = 0, 15, 30,$  and  $45$  min).

**Table S1. Details of mass spectrometry analysis on Hst3**

| Sites                      | Part of degnon? |
|----------------------------|-----------------|
| Site in untreated cells    |                 |
| T380                       | D1              |
| Sites in MMS-treated cells |                 |
| T172                       |                 |
| S173                       |                 |
| T377                       | D1              |
| T380                       | D1              |
| T384                       | D1              |
| S406                       |                 |
| S416                       | D2              |
| S420                       | D2              |
| S421                       | D2              |
